# Supplementary material for: Chemoselective hydrogen peroxide oxidation of allylic and benzylic alcohols under mild reaction conditions catalyzed by simple iron-picolinate complexes
Source: Royal Society of Chemistry journal article supplement (doi:10.1039/c4ra05819d), 2014-08-12
Supplement: c4ra05819d1.pdf [file c4ra05819d1.pdf]

Supporting information for

## **Chemoselective Hydrogen Peroxide Oxidation of Allylic and Benzylic Alcohols under Mild Reaction Conditions Catalyzed by Simple Iron-picolinate Complexes**

Shinji Tanaka, Yoshihiro Kon,\* Takuya Nakashima, and Kazuhiko Sato\*

Interdisciplinary Research Center for Catalytic Chemistry, National Institute of Advanced Industrial Science and Technology (AIST), Central 5, Higashi 1-1-1, Tsukuba, Japan  
Fax: (+81)-29-861-4511; phone: (+81)-29-861-4511; e-mail: k.sato@aist.go.jp

### **Contents**

|    |                                             |    |
|----|---------------------------------------------|----|
| 1. | General procedure                           | S2 |
| 2. | Procedure for catalytic reaction            | S3 |
| 3. | Spectral data of isolated compounds         | S4 |
| 4. | Table S1, S2, and S3                        | S5 |
| 5. | Oxidation of cyclobutanol <b>1r</b> (eq S1) | S7 |
| 6. | References                                  | S8 |

## General Procedure

$^1\text{H}$  NMR (400 MHz) and  $^{13}\text{C}$  NMR (100 MHz) spectra were recorded on JEOL 400 MHz NMR spectrometers. All spectra were recorded at  $25 \pm 1$  °C. Chemical shifts ( $\delta$ ) are in parts per million relative to residual  $\text{CHCl}_3$  at 7.26 ppm for  $^1\text{H}$  and at 77.0 ppm for  $^{13}\text{C}$  or DMSO at 2.50 ppm for  $^1\text{H}$  and at 39.52 ppm for  $^{13}\text{C}$  unless otherwise noted. Gas chromatographic (GC) analyses were performed on a Shimadzu GC-2014 using an INERT CAP column (0.25 mm x 30 m, GL Sciences Inc.). All samples were analyzed and quantified by using biphenyl as an internal standard. Melting points were measured with a Mettler FP90 microscope on an object slide. Elemental analyses were measured on Thermo Fisher Scientific Inc. Flash2000. In X-ray crystallographic analyses, data were collected on a Bruker APEX-II CCD diffractometer using graphite-monochromated  $\text{MoK}_\alpha$  radiation. The structures were solved by direct methods (SHELXS-97) and refined by full matrix least-squares techniques on  $F^2$  (SHELXL-97).<sup>1</sup> The ORTEP-3 program was used to draw the molecule.<sup>2</sup>

Picolinic acid (picH), 6-methylpicolinic acid (Me-picH), 6-methoxypicolinic acid, 2,6-dicarboxypyridine, cinnamyl alcohol, cinnamaldehyde, allyl alcohol, acrolein, *trans*-crotyl alcohol  $\beta$ -methallyl alcohol, 3-methyl-2-buten-1-ol, 3-methyl-2-butenal, *trans*-2-octen-1-ol, *trans*-2-octenal,  $\alpha$ -methylcinnamyl alcohol,  $\alpha$ -methylcinnamaldehyde, citral, benzylalcohol, 2-octanol, n-octanal, 1,3-diphenyl-2-propen-1-ol, chalcone, 1-buten-3-ol, *trans*-3-octen-2-ol, 2-cyclohexen-1-ol, 2-cyclohexen-1-one, 1-phenylethanol, acetophenone, 2-octanon, 1-phenyl-1,2-ethanediol,  $\beta$ -hydroxyacetophenone, and biphenyl were purchased from Tokyo Chemical Industry co., Ltd. Iron(II) acetate, 6-trifluoromethylpicolinic acid, methacrolein, benzaldehyde, methylvinylketone, 4-benzoylbenzoic acid, *N-tert*-butyl- $\alpha$ -phenylnitron, and 4-chlorostyrene oxide were from Sigma-Aldrich. Iron(III) chloride, crotonaldehyde, *trans*-2-hexen-1-ol, *trans*-2-hexenal, geraniol, 1-octanol, 3-octen-2-one, 2,6-di-*tert*-butyl-4-methylphenol, cyclobutanol, cyclobutanone, duroquinone, toluene, THF,  $\text{CDCl}_3$ , and MeCN were from Wako Pure Chemical Industries, Ltd. 35% hydrogen peroxide aqueous solution was from Kanto Chemical Co., Inc. Iron(III) acetate hydroxide was from Kishida Inc., respectively. All chemicals were used as received.  $[\text{Fe}(\text{Me-pic})_2(\text{pic})](\mathbf{4})^3$  and 3-(hydroxymethyl)phenyl]phenyl)methanol<sup>4</sup> were prepared according to literature. Oxidation reactions of alcohols in small scale were performed using ChemiStation (Tokyo Rika Inc.) equipped with thermostated apparatus.

## **Procedure for catalytic reaction**

### **Preparation of catalyst solution.**

Fe(OAc)<sub>2</sub> (9.0 mg, 0.052 mmol) and Me-PicH (21.0 mg, 0.153 mmol) were suspended in CH<sub>3</sub>CN (3 mL). The mixture was warmed to 50 °C with gentle stirring until almost all of iron acetate was dissolved (ca. 5 min), then the solution was filtered with membrane filter (pore size: 0.20 μm). The filtrate was diluted with CH<sub>3</sub>CN, to adjust the total volume to 4 mL (the concentration of iron: 0.01 mol·L<sup>-1</sup>). The catalyst solutions with the different ligand ratio were also prepared in the same manner using the appropriate amount of PicH and Me-PicH. This procedure was also applied for preparation of catalyst solution with other iron salts such as FeCl<sub>3</sub> · 6H<sub>2</sub>O.

### **Typical procedure for the oxidation reaction.**

Alcohol (1.0 mmol) was dissolved in 4 mL of the catalyst solution. 35% aqueous H<sub>2</sub>O<sub>2</sub> (0.110 μL, 1.25 mmol) was added dropwise to the solution via a syringe pump for 10 min at 25 °C, and the reaction solution was further stirred for 5 min at 25 °C. To the resulting mixture was then added 6 mL of CH<sub>3</sub>CN and measured amount of biphenyl (as an internal standard for GC analysis). The conversion of substrate and the yield of carbonyl compounds were determined by GC analysis. Products were identified by comparison to the GC retention time of authentic samples. The same reaction was performed twice for each substrate.

### **Oxidation of cinnamyl alcohol (10-g scale).**

Cinnamyl alcohol (13.9 g, 0.100 mol) was dissolved in 400 mL of the catalyst solution prepared above. To the solution was added 35% aqueous H<sub>2</sub>O<sub>2</sub> (11.1 mL, 125 mmol) dropwise via a dropping funnel for 30 min at 25 °C, and the reaction solution was further stirred for 5 min at 25 °C. Saturated sodium thiosulfate solution (25 mL) was added to the resulting solution, and the mixture was stirred for another 5 min at 25 °C. The organic layer was separated, and CH<sub>3</sub>CN was removed by rotary evaporator. The residual crude product was purified by distillation under reduced pressure, giving 11.1 g of cinnamaldehyde (84% yield).

### **Synthesis of [Fe(Me-pic)<sub>3</sub>](4).**

Fe(OAc)<sub>2</sub> (200 mg, 1.15 mmol) and Me-PicH (790 mg, 5.76 mmol) were suspended in MeCN (60 mL). The mixture was warmed to 50 °C with gentle stirring until almost all of the iron acetate was dissolved (ca. 15 min). The solution was then filtered. Recrystallization from MeCN afforded pure [Fe(Me-pic)<sub>3</sub>](4) (277 mg, 0.596 mmol, 52% yield) as yellow crystals. M.p. 206-210 °C (decomp.); Anal. Calcd for C<sub>21</sub>H<sub>18</sub>FeN<sub>3</sub>O<sub>6</sub>: C 54.33; H 3.91; N 9.05. Found: C 54.13; H 3.91; N 9.09.

### Spectral data of isolated compounds

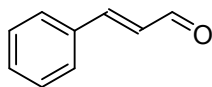

Cinnamaldehyde **2a**<sup>5</sup>: pale yellow oil <sup>1</sup>H NMR (400 MHz, CDCl<sub>3</sub>): δ = 6.72 (dd, *J* = 16, 7.8 Hz, 1H), 7.4-7.6 (m, 6H), 9.71 (d, *J* = 7.8 Hz, 1H); <sup>13</sup>C{<sup>1</sup>H} NMR (100 MHz, CDCl<sub>3</sub>): δ = 128.4, 128.5, 129.0, 131.2, 133.9, 152.7, 193.6.

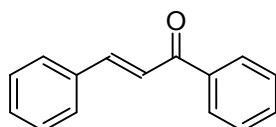

Chalcone **2k**<sup>6</sup>: Crude product was purified by silica gel column chromatography (EtOAc/Hexane). Pale yellow solid. Small amount of *Z*-isomer was contained (*E* : *Z* = 50 : 1). <sup>1</sup>H NMR (400 MHz, CDCl<sub>3</sub>): δ = 7.41-7.45 (m, 3H), 7.48-7.68 (m, 6H), 7.82 (d, *J* = 15.8 Hz, 2H), 8.01-8.04 (m, 2H); <sup>13</sup>C{<sup>1</sup>H} NMR (100 MHz, CDCl<sub>3</sub>): δ = 122.1, 128.4, 128.5, 128.6, 128.9, 130.5, 132.7, 134.8, 138.2, 144.8, 190.5.

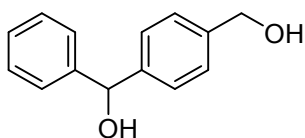

4-((Hydroxymethyl)phenyl)benzylalcohol **10**<sup>7</sup>: This compound was prepared from 4-benzoylbenzoic acid according to the literature.<sup>4</sup> <sup>1</sup>H NMR (400 MHz, DMSO-*d*<sub>6</sub>): δ = 4.45 (d, *J* = 5.7 Hz, 2H), 5.10 (t, *J* = 5.7 Hz, 6H), 5.69 (d, *J* = 4.0 Hz, 2H), 5.84 (d, *J* = 3.9 Hz, 2H); 7.15-7.38 (m, 9H), <sup>13</sup>C{<sup>1</sup>H} NMR (100 MHz, DMSO-*d*<sub>6</sub>): δ = 62.8, 74.1, 125.9, 126.1<sub>8</sub>, 126.2<sub>4</sub>, 126.6, 128.0, 140.9, 144.1, 145.8.

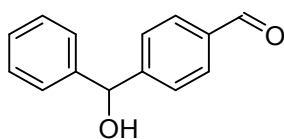

4-((Hydroxymethyl)phenyl)benzaldehyde **11**<sup>8</sup>: Crude product was purified by silica gel column chromatography (EtOAc/Hexane), giving **11** in 68% yield. <sup>1</sup>H NMR (400 MHz, CDCl<sub>3</sub>): δ = 2.35 (br s, 1H), 5.91 (s, 1H) 7.27-7.37 (m, 5H), 7.58 (d, *J* = 8.1 Hz, 2H), 7.85 (d, *J* = 8.2 Hz, 2H), 9.99 (s, 1H); <sup>13</sup>C{<sup>1</sup>H} NMR (100 MHz, CDCl<sub>3</sub>): δ = 126.6, 126.9, 128.1, 128.8, 129.9, 135.6, 143.0, 150.3, 191.9.

**Table S1.** Oxidation of 1,3-diphenyl-1-propen-3-ol **1k** by various catalysts<sup>a</sup>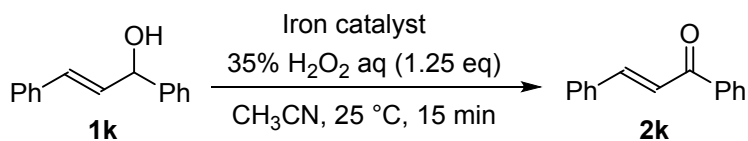

| Entry | Catalyst [mol%]      |      |         | Conv. [%] <sup>b</sup> | Yield [%] <sup>b</sup> | Sel. [%] <sup>c</sup> |
|-------|----------------------|------|---------|------------------------|------------------------|-----------------------|
|       | Fe(OAc) <sub>2</sub> | PicH | Me-PicH |                        |                        |                       |
| 1     | 5                    | 15   | 0       | 80                     | 49                     | 61                    |
| 2     | 5                    | 5    | 5       | 99                     | 93(91) <sup>d</sup>    | 93                    |
| 3     | 5                    | 0    | 15      | 88                     | 78                     | 89                    |

<sup>a</sup> CH<sub>3</sub>CN solution, 25 °C, dropwise addition of 1.25 eq. of 35% H<sub>2</sub>O<sub>2</sub> aq. for 10 min. and further stirring for 5 min., unless otherwise stated. <sup>b</sup> Determined by GC using biphenyl as an internal standard. Average of two runs. <sup>c</sup> yield / conversion x 100. <sup>d</sup> Isolated yield.

**Table S2.** Oxidation of **1a** and **1k** by iron complexes<sup>a</sup>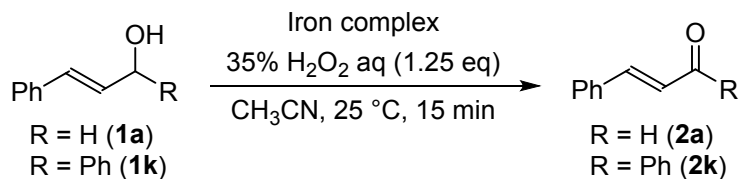

| Entry | Substrate | Catalyst | Amount [mol%] | Conv. [%] <sup>b</sup> | Yield [%] <sup>b</sup> | Sel. [%] <sup>c</sup> |
|-------|-----------|----------|---------------|------------------------|------------------------|-----------------------|
|       |           |          |               |                        |                        |                       |
| 2     | <b>1a</b> | <b>4</b> | 5             | 98                     | 90                     | 92                    |
| 3     | <b>1k</b> | <b>3</b> | 5             | 85                     | 80                     | 94                    |
| 4     | <b>1k</b> | <b>4</b> | 5             | 80                     | 69                     | 87                    |

<sup>a</sup> CH<sub>3</sub>CN solution, 25 °C, dropwise addition of 1.25 eq. of 35% H<sub>2</sub>O<sub>2</sub> aq. for 10 min. and further stirring for 5 min., unless otherwise stated. <sup>b</sup> Determined by GC using biphenyl as an internal standard. Average of two runs. <sup>c</sup> yield / conversion x 100.

**Table S3.** Oxidation of **1a** and **1k** by in the presence of radical trapping agents<sup>a</sup>

|       |           | Iron catalyst <b>A</b> or <b>B</b><br>radical trapping agent (1 eq)<br>35% H <sub>2</sub> O <sub>2</sub> aq (1.25 eq) |                                              |                                                                                     |                           |                          |
|-------|-----------|-----------------------------------------------------------------------------------------------------------------------|----------------------------------------------|-------------------------------------------------------------------------------------|---------------------------|--------------------------|
|       |           | 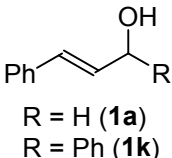                                     | →                                            |  |                           |                          |
|       |           | CH <sub>3</sub> CN, 25 °C, 15 min                                                                                     |                                              |                                                                                     |                           |                          |
|       |           | R = H ( <b>1a</b> )<br>R = Ph ( <b>1k</b> )                                                                           |                                              |                                                                                     |                           |                          |
|       |           | R = H ( <b>2a</b> )<br>R = Ph ( <b>2k</b> )                                                                           |                                              |                                                                                     |                           |                          |
| Entry | Substrate | Catalyst <sup>b</sup>                                                                                                 | Radical trapping agent                       | Conv.<br>[%] <sup>c</sup>                                                           | Yield<br>[%] <sup>c</sup> | Sel.<br>[%] <sup>d</sup> |
| 1     | <b>1a</b> | <b>A</b>                                                                                                              | duroquinone                                  | 96                                                                                  | 91                        | 95                       |
| 2     | <b>1a</b> | <b>A</b>                                                                                                              | 2,6- <i>tert</i> -butyl-4-methylphenol       | 37                                                                                  | 32                        | 86                       |
| 3     | <b>1a</b> | <b>A</b>                                                                                                              | <i>N-tert</i> -butyl- $\alpha$ -phenylnitron | 59                                                                                  | 54                        | 92                       |
| 4     | <b>1k</b> | <b>B</b>                                                                                                              | duroquinone                                  | 99                                                                                  | 97                        | 97                       |
| 5     | <b>1k</b> | <b>B</b>                                                                                                              | 2,6- <i>tert</i> -butyl-4-methylphenol       | 42                                                                                  | 31                        | 75                       |
| 6     | <b>1k</b> | <b>B</b>                                                                                                              | <i>N-tert</i> -butyl- $\alpha$ -phenylnitron | 73                                                                                  | 68                        | 93                       |

<sup>a</sup> CH<sub>3</sub>CN solution, 25 °C, dropwise addition of 1.25 eq. of 35% H<sub>2</sub>O<sub>2</sub> aq. for 10 min. and further stirring for 5 min., unless otherwise stated. <sup>b</sup> catalyst **A** : Fe(OAc)<sub>2</sub> (5 mol%), Me-PicH (15 mol%); catalyst **B** : Fe(OAc)<sub>2</sub> (5 mol%), PicH (5 mol%), Me-PicH (5 mol%) <sup>c</sup> Determined by GC using biphenyl as an internal standard. <sup>d</sup> yield / conversion x 100.

**Scheme S1.** Oxidation of Cyclobutanol **1p**

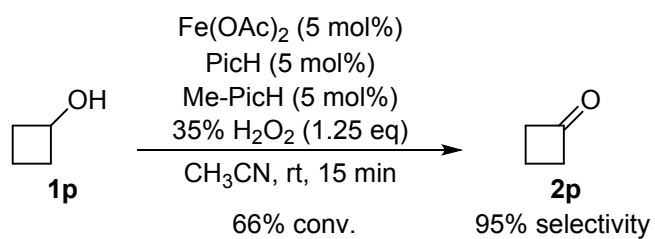

## References

1. G. M. Sheldrick, *Programs for Crystal Structure Analysis (Release97-2)*; University of Göttingen: Göttingen, Germany, 1997.
2. L. J. J. Farrugia, *Appl. Crystallogr.*, 1997, **30**, 565.
3. T. Chishiro, Y. Kon, T. Nakashima, M. Goto, and K. Sato, *Adv. Synth. Catal.*, 2014, 623.
4. J. M. Hoover, and S. S. Stahl, *J. Am. Chem. Soc.*, 2011, **133**, 16901.
5. P. Das, N. Aggarwal, N. R. Guha, *Tetrahedron Lett.*, 2013, **54**, 2924.
6. J. Schranck, X.-F. Wu, H. Neumann, and M. Beller, *Chem. Eur. J.*, 2012, **18**, 4827.
7. (a) C. Gómez, F. F. Huerta, and M. Yus, *Tetrahedron*, 1998, **54**, 1853. b) M. Uchiyama, T. Furuyama, M. Kobayashi, Y. Matsumoto, K. Tanaka, *J. Am. Chem. Soc.*, 2006, **128**, 8404.
8. M. Kuriyama, N. Ishiyama, R. Shimazawa, O. Onomura, *Tetrahedron*, 2010, **66**, 6814.
